# Supplementary material for: Judgements about double-embedded relative clauses differ between languages
Source: Psychol Res. 2018 Apr 23;83(7):1581–93. doi: 10.1007/s00426-018-1014-7 (PMC6754359; doi:10.1007/s00426-018-1014-7)
Supplement: Supplementary file 1 — Supplementary material 1 (csv 13 KB) [file 426_2018_1014_MOESM1_ESM.csv]

Subject	Age	Item	List	Condition	Comprehensibility	Acceptability
1	34	manuscript	4	3	4	4
1	34	song	4	0	7	6
1	34	game	4	1	3	2
1	34	ball	4	2	2	2
1	34	house	4	3	1	1
1	34	article	4	0	6	5
1	34	book	4	1	2	2
1	34	sculpture	4	2	2	1
1	34	music	4	3	2	1
1	34	flim	4	0	6	4
1	34	room	4	1	2	1
1	34	restaurant	4	2	2	1
2	21	restaurant	7	1	3	3
2	21	room	7	0	5	5
2	21	flim	7	3	1	1
2	21	music	7	2	3	3
2	21	sculpture	7	1	3	3
2	21	book	7	0	3	3
2	21	article	7	3	3	3
2	21	house	7	2	2	2
2	21	ball	7	1	3	3
2	21	game	7	0	3	3
2	21	song	7	3	3	3
2	21	manuscript	7	2	4	4
3	20	manuscript	1	0	4	4
3	20	song	1	1	7	1
3	20	game	1	2	3	2
3	20	ball	1	3	2	2
3	20	house	1	0	3	3
3	20	article	1	1	6	2
3	20	book	1	2	5	2
3	20	sculpture	1	3	2	2
3	20	music	1	0	6	1
3	20	flim	1	1	2	2
3	20	room	1	2	4	4
3	20	restaurant	1	3	4	4
4	36	restaurant	5	3	4	2
4	36	room	5	2	5	3
4	36	flim	5	1	4	2
4	36	music	5	0	6	5
4	36	sculpture	5	3	3	1
4	36	book	5	2	5	3
4	36	article	5	1	5	3
4	36	house	5	0	5	3
4	36	ball	5	3	5	3
4	36	game	5	2	6	5
4	36	song	5	1	5	2
4	36	manuscript	5	0	6	5
5	21	manuscript	1	0	4	2
5	21	song	1	1	4	2
5	21	game	1	2	5	3
5	21	ball	1	3	4	3
5	21	house	1	0	4	3
5	21	article	1	1	4	3
5	21	book	1	2	5	4
5	21	sculpture	1	3	4	3
5	21	music	1	0	5	3
5	21	flim	1	1	5	4
5	21	room	1	2	4	3
5	21	restaurant	1	3	5	4
6	20	manuscript	3	2	2	2
6	20	song	3	3	6	2
6	20	game	3	0	2	6
6	20	ball	3	1	6	1
6	20	house	3	2	6	1
6	20	article	3	3	4	1
6	20	book	3	0	7	1
6	20	sculpture	3	1	7	1
6	20	music	3	2	7	1
6	20	flim	3	3	6	1
6	20	room	3	0	7	7
6	20	restaurant	3	1	7	1
7	20	restaurant	5	3	2	2
7	20	room	5	2	1	1
7	20	flim	5	1	1	1
7	20	music	5	0	6	4
7	20	sculpture	5	3	1	1
7	20	book	5	2	4	3
7	20	article	5	1	1	1
7	20	house	5	0	5	1
7	20	ball	5	3	4	1
7	20	game	5	2	3	1
7	20	song	5	1	4	1
7	20	manuscript	5	0	4	2
8	29	manuscript	2	1	3	2
8	29	song	2	2	4	2
8	29	game	2	3	2	1
8	29	ball	2	0	4	2
8	29	house	2	1	2	1
8	29	article	2	2	4	2
8	29	book	2	3	2	1
8	29	sculpture	2	0	3	1
8	29	music	2	1	2	1
8	29	flim	2	2	2	1
8	29	room	2	3	2	1
8	29	restaurant	2	0	2	1
9	19	manuscript	4	3	4	1
9	19	song	4	0	7	5
9	19	game	4	1	5	2
9	19	ball	4	2	5	2
9	19	house	4	3	3	1
9	19	article	4	0	6	5
9	19	book	4	1	5	2
9	19	sculpture	4	2	5	3
9	19	music	4	3	5	1
9	19	flim	4	0	5	4
9	19	room	4	1	5	2
9	19	restaurant	4	2	4	2
10	47	restaurant	7	1	7	7
10	47	room	7	0	6	6
10	47	flim	7	3	6	6
10	47	music	7	2	6	6
10	47	sculpture	7	1	7	7
10	47	book	7	0	7	7
10	47	article	7	3	7	7
10	47	house	7	2	7	7
10	47	ball	7	1	7	7
10	47	game	7	0	6	6
10	47	song	7	3	7	5
10	47	manuscript	7	2	7	5
11	21	restaurant	6	0	5	3
11	21	room	6	3	3	1
11	21	flim	6	2	4	2
11	21	music	6	1	3	1
11	21	sculpture	6	0	5	4
11	21	book	6	3	4	1
11	21	article	6	2	5	2
11	21	house	6	1	5	2
11	21	ball	6	0	3	2
11	21	game	6	3	5	4
11	21	song	6	2	5	2
11	21	manuscript	6	1	5	5
12	20	restaurant	7	1	5	3
12	20	room	7	0	6	5
12	20	flim	7	3	5	3
12	20	music	7	2	6	4
12	20	sculpture	7	1	7	4
12	20	book	7	0	6	4
12	20	article	7	3	4	3
12	20	house	7	2	5	3
12	20	ball	7	1	4	3
12	20	game	7	0	5	4
12	20	song	7	3	5	4
12	20	manuscript	7	2	4	4
13	24	manuscript	4	3	4	4
13	24	song	4	0	1	1
13	24	game	4	1	4	3
13	24	ball	4	2	4	2
13	24	house	4	3	4	2
13	24	article	4	0	4	2
13	24	book	4	1	4	3
13	24	sculpture	4	2	5	3
13	24	music	4	3	5	4
13	24	flim	4	0	5	3
13	24	room	4	1	7	5
13	24	restaurant	4	2	7	7
14	31	manuscript	2	1	3	4
14	31	song	2	2	3	3
14	31	game	2	3	2	2
14	31	ball	2	0	2	2
14	31	house	2	1	2	2
14	31	article	2	2	4	4
14	31	book	2	3	3	3
14	31	sculpture	2	0	5	5
14	31	music	2	1	2	2
14	31	flim	2	2	2	2
14	31	room	2	3	2	2
14	31	restaurant	2	0	4	4
15	31	restaurant	5	3	1	1
15	31	room	5	2	1	1
15	31	flim	5	1	3	2
15	31	music	5	0	4	2
15	31	sculpture	5	3	1	1
15	31	book	5	2	3	2
15	31	article	5	1	3	1
15	31	house	5	0	3	1
15	31	ball	5	3	3	1
15	31	game	5	2	5	6
15	31	song	5	1	5	1
15	31	manuscript	5	0	3	1
16	20	manuscript	3	2	3	3
16	20	song	3	3	3	2
16	20	game	3	0	5	3
16	20	ball	3	1	4	1
16	20	house	3	2	4	1
16	20	article	3	3	5	2
16	20	book	3	0	4	3
16	20	sculpture	3	1	4	2
16	20	music	3	2	4	2
16	20	flim	3	3	4	2
16	20	room	3	0	5	2
16	20	restaurant	3	1	4	3
17	30	manuscript	1	0	4	2
17	30	song	1	1	4	1
17	30	game	1	2	5	4
17	30	ball	1	3	3	1
17	30	house	1	0	4	2
17	30	article	1	1	6	5
17	30	book	1	2	3	4
17	30	sculpture	1	3	2	2
17	30	music	1	0	4	1
17	30	flim	1	1	2	2
17	30	room	1	2	1	3
17	30	restaurant	1	3	5	2
18	62	manuscript	3	2	1	1
18	62	song	3	3	1	1
18	62	game	3	0	1	1
18	62	ball	3	1	3	1
18	62	house	3	2	4	1
18	62	article	3	3	3	1
18	62	book	3	0	3	1
18	62	sculpture	3	1	1	1
18	62	music	3	2	2	1
18	62	flim	3	3	3	1
18	62	room	3	0	3	1
18	62	restaurant	3	1	2	1
19	25	restaurant	8	2	5	3
19	25	room	8	1	2	1
19	25	flim	8	0	5	3
19	25	music	8	3	5	2
19	25	sculpture	8	2
19	25	book	8	1
19	25	article	8	0
19	25	house	8	3
19	25	ball	8	2
19	25	game	8	1
19	25	song	8	0
19	25	manuscript	8	3
20	20	restaurant	8	2	2	1
20	20	room	8	1	3	1
20	20	flim	8	0	2	1
20	20	music	8	3	3	1
20	20	sculpture	8	2	4	1
20	20	book	8	1	2	1
20	20	article	8	0	3	2
20	20	house	8	3	2	1
20	20	ball	8	2
20	20	game	8	1
20	20	song	8	0
20	20	manuscript	8	3
21	23	manuscript	4	3	2	2
21	23	song	4	0	1	1
21	23	game	4	1	1	1
21	23	ball	4	2	1	1
21	23	house	4	3	2	2
21	23	article	4	0	2	2
21	23	book	4	1	2	2
21	23	sculpture	4	2	3	3
21	23	music	4	3	2	2
21	23	flim	4	0	4	4
21	23	room	4	1	3	3
21	23	restaurant	4	2	2	2
22	20	restaurant	8	2	6	6
22	20	room	8	1	3	2
22	20	flim	8	0	6	5
22	20	music	8	3
22	20	sculpture	8	2
22	20	book	8	1
22	20	article	8	0
22	20	house	8	3
22	20	ball	8	2
22	20	game	8	1
22	20	song	8	0
22	20	manuscript	8	3
23	54	restaurant	6	0	3	2
23	54	room	6	3	3	2
23	54	flim	6	2	2	1
23	54	music	6	1	3	3
23	54	sculpture	6	0	6	3
23	54	book	6	3	3	2
23	54	article	6	2	6	3
23	54	house	6	1	3	2
23	54	ball	6	0	3	2
23	54	game	6	3	4	3
23	54	song	6	2	3	2
23	54	manuscript	6	1	2	2
24	31	restaurant	7	1	6	4
24	31	room	7	0	7	5
24	31	flim	7	3	1	1
24	31	music	7	2	7	5
24	31	sculpture	7	1
24	31	book	7	0
24	31	article	7	3
24	31	house	7	2
24	31	ball	7	1
24	31	game	7	0
24	31	song	7	3
24	31	manuscript	7	2
25	58	restaurant	8	2	1	1
25	58	room	8	1	7	7
25	58	flim	8	0	4	1
25	58	music	8	3	2	1
25	58	sculpture	8	2	2	1
25	58	book	8	1	3	1
25	58	article	8	0	3	1
25	58	house	8	3	3	1
25	58	ball	8	2	3	1
25	58	game	8	1	2	1
25	58	song	8	0
25	58	manuscript	8	3
26	22	restaurant	5	3	2	2
26	22	room	5	2	2	2
26	22	flim	5	1	2	2
26	22	music	5	0	4	2
26	22	sculpture	5	3	2	2
26	22	book	5	2	2	2
26	22	article	5	1	3	3
26	22	house	5	0	2	2
26	22	ball	5	3	4	3
26	22	game	5	2
26	22	song	5	1
26	22	manuscript	5	0
27	20	restaurant	8	2	2	2
27	20	room	8	1	5	2
27	20	flim	8	0	3	3
27	20	music	8	3	2	2
27	20	sculpture	8	2	3	3
27	20	book	8	1	4	3
27	20	article	8	0	5	4
27	20	house	8	3	3	2
27	20	ball	8	2	4	2
27	20	game	8	1	3	2
27	20	song	8	0	4	2
27	20	manuscript	8	3	4	2
28	57	manuscript	2	1	1	1
28	57	song	2	2	1	1
28	57	game	2	3	1	1
28	57	ball	2	0	1	1
28	57	house	2	1	1	1
28	57	article	2	2	7	7
28	57	book	2	3	1	1
28	57	sculpture	2	0	1	1
28	57	music	2	1	7	7
28	57	flim	2	2	1	1
28	57	room	2	3	1	1
28	57	restaurant	2	0	7	7
29	60	manuscript	1	0	3	3
29	60	song	1	1	2	2
29	60	game	1	2	3	2
29	60	ball	1	3	2	2
29	60	house	1	0	3	2
29	60	article	1	1	3	2
29	60	book	1	2	5	3
29	60	sculpture	1	3	3	2
29	60	music	1	0	3	3
29	60	flim	1	1	3	2
29	60	room	1	2	3	2
29	60	restaurant	1	3	2	1
30	60	manuscript	2	1	3	2
30	60	song	2	2	2	2
30	60	game	2	3	4	4
30	60	ball	2	0	2	3
30	60	house	2	1	2	2
30	60	article	2	2	3	3
30	60	book	2	3	3	3
30	60	sculpture	2	0	4	2
30	60	music	2	1	4	3
30	60	flim	2	2	4	3
30	60	room	2	3	2	2
30	60	restaurant	2	0	4	3
31	21	manuscript	8	2	6	3
31	21	song	8	1	3	1
31	21	game	8	0	5	2
31	21	ball	8	3	3	3
31	21	house	8	2	4	2
31	21	article	8	1	4	2
31	21	book	8	0	5	2
31	21	sculpture	8	3	5	3
31	21	music	8	2	4	3
31	21	flim	8	1	4	2
31	21	room	8	0	4	3
31	21	restaurant	8	3	5	3
32	19	manuscript	4	3	2	2
32	19	song	4	0	6	3
32	19	game	4	1	2	2
32	19	ball	4	2	2	2
32	19	house	4	3	1	1
32	19	article	4	0	6	4
32	19	book	4	1	5	4
32	19	sculpture	4	2	3	1
32	19	music	4	3	4	2
32	19	flim	4	0	5	3
32	19	room	4	1	2	2
32	19	restaurant	4	2	6	3
33	20	restaurant	5	3	4	2
33	20	room	5	2	4	1
33	20	flim	5	1	5	1
33	20	music	5	0	6	3
33	20	sculpture	5	3	2	2
33	20	book	5	2	3	1
33	20	article	5	1	4	1
33	20	house	5	0	3	1
33	20	ball	5	3	2	1
33	20	game	5	2	3	2
33	20	song	5	1	3	2
33	20	manuscript	5	0	5	4
34	22	restaurant	6	0	2	2
34	22	room	6	3	3	3
34	22	flim	6	2	2	1
34	22	music	6	1	3	2
34	22	sculpture	6	0	1	1
34	22	book	6	3	2	2
34	22	article	6	2	2	2
34	22	house	6	1	5	2
34	22	ball	6	0	5	1
34	22	game	6	3	1	1
34	22	song	6	2	1	1
34	22	manuscript	6	1	2	2
35	23	restaurant	8	2	1	1
35	23	room	8	1	2	2
35	23	flim	8	0	1	1
35	23	music	8	3	1	1
35	23	sculpture	8	2	1	1
35	23	book	8	1	5	5
35	23	article	8	0	1	1
35	23	house	8	3	4	1
35	23	ball	8	2	4	3
35	23	game	8	1	2	2
35	23	song	8	0	5	5
35	23	manuscript	8	3	2	2
36	45	restaurant	7	1	5	4
36	45	room	7	0	2	2
36	45	flim	7	3	2	2
36	45	music	7	2	7	5
36	45	sculpture	7	1	5	2
36	45	book	7	0	6	4
36	45	article	7	3	6	4
36	45	house	7	2	4	2
36	45	ball	7	1	7	4
36	45	game	7	0	6	2
36	45	song	7	3	2	2
36	45	manuscript	7	2	6	4
37	45	manuscript	2	1	1	1
37	45	song	2	2	1	1
37	45	game	2	3	1	1
37	45	ball	2	0	5	5
37	45	house	2	1	4	4
37	45	article	2	2	4	4
37	45	book	2	3	2	1
37	45	sculpture	2	0	5	4
37	45	music	2	1	3	1
37	45	flim	2	2	1	1
37	45	room	2	3	2	2
37	45	restaurant	2	0	4	4
38	28	manuscript	1	0	2	3
38	28	song	1	1	4	2
38	28	game	1	2	4	1
38	28	ball	1	3	5	3
38	28	house	1	0	2	1
38	28	article	1	1	3	5
38	28	book	1	2	3	3
38	28	sculpture	1	3	3	1
38	28	music	1	0	5	3
38	28	flim	1	1	4	3
38	28	room	1	2	3	1
38	28	restaurant	1	3	2	1
39	27	restaurant	5	3	2	1
39	27	room	5	2	2	1
39	27	flim	5	1	2	1
39	27	music	5	0	2	1
39	27	sculpture	5	3	3	1
39	27	book	5	2	3	1
39	27	article	5	1	4	1
39	27	house	5	0	3	1
39	27	ball	5	3	2	1
39	27	game	5	2	4	3
39	27	song	5	1	3	1
39	27	manuscript	5	0	3	2
40	23	restaurant	7	1	6	3
40	23	room	7	0	5	3
40	23	flim	7	3	6	4
40	23	music	7	2	5	3
40	23	sculpture	7	1	6	4
40	23	book	7	0	5	4
40	23	article	7	3	6	5
40	23	house	7	2	6	3
40	23	ball	7	1	5	3
40	23	game	7	0	5	2
40	23	song	7	3	3	2
40	23	manuscript	7	2	4	3
41	38	manuscript	4	3	3	3
41	38	song	4	0	3	3
41	38	game	4	1	2	1
41	38	ball	4	2	3	2
41	38	house	4	3	2	2
41	38	article	4	0	3	2
41	38	book	4	1	3	2
41	38	sculpture	4	2	4	2
41	38	music	4	3	3	3
41	38	flim	4	0	5	3
41	38	room	4	1	4	2
41	38	restaurant	4	2	4	2
42	59	manuscript	3	2	1	1
42	59	song	3	3	1	1
42	59	game	3	0	1	1
42	59	ball	3	1	5	3
42	59	house	3	2	7	3
42	59	article	3	3	4	1
42	59	book	3	0	6	1
42	59	sculpture	3	1	7	4
42	59	music	3	2	6	3
42	59	flim	3	3	4	1
42	59	room	3	0	5	1
42	59	restaurant	3	1	6	3
43	22	restaurant	6	0	7	7
43	22	room	6	3	3	2
43	22	flim	6	2	4	3
43	22	music	6	1	7	7
43	22	sculpture	6	0	3	2
43	22	book	6	3	3	3
43	22	article	6	2	3	2
43	22	house	6	1	2	6
43	22	ball	6	0	4	3
43	22	game	6	3	4	3
43	22	song	6	2	5	6
43	22	manuscript	6	1	3	6
44	46	restaurant	5	3	5	5
44	46	room	5	2	3	3
44	46	flim	5	1	3	3
44	46	music	5	0	5	5
44	46	sculpture	5	3	3	3
44	46	book	5	2	4	4
44	46	article	5	1	5	5
44	46	house	5	0	2	2
44	46	ball	5	3	2	2
44	46	game	5	2	2	2
44	46	song	5	1	2	2
44	46	manuscript	5	0	6	6
45	46	restaurant	8	2	2	2
45	46	room	8	1	4	2
45	46	flim	8	0	5	3
45	46	music	8	3	3	2
45	46	sculpture	8	2	4	2
45	46	book	8	1	5	2
45	46	article	8	0	6	4
45	46	house	8	3	5	2
45	46	ball	8	2	6	3
45	46	game	8	1	5	4
45	46	song	8	0	5	3
45	46	manuscript	8	3	5	3
46	61	restaurant	7	1	5	1
46	61	room	7	0	4	1
46	61	flim	7	3	1	1
46	61	music	7	2	1	1
46	61	sculpture	7	1	5	1
46	61	book	7	0	1	1
46	61	article	7	3	1	1
46	61	house	7	2	1	1
46	61	ball	7	1	1	1
46	61	game	7	0	1	1
46	61	song	7	3	1	1
46	61	manuscript	7	2	1	1
47	25	manuscript	3	2	2	1
47	25	song	3	3	3	1
47	25	game	3	0	4	2
47	25	ball	3	1	1	1
47	25	house	3	2	2	1
47	25	article	3	3	3	1
47	25	book	3	0	4	3
47	25	sculpture	3	1	2	1
47	25	music	3	2	4	4
47	25	flim	3	3	2	3
47	25	room	3	0	6	4
47	25	restaurant	3	1	1	3
48	23	manuscript	3	2	3	4
48	23	song	3	3	3	2
48	23	game	3	0	5	4
48	23	ball	3	1	5	3
48	23	house	3	2
48	23	article	3	3
48	23	book	3	0
48	23	sculpture	3	1
48	23	music	3	2
48	23	flim	3	3
48	23	room	3	0
48	23	restaurant	3	1
49	21	manuscript	2	1	2	2
49	21	song	2	2	2	1
49	21	game	2	3	2	1
49	21	ball	2	0	5	3
49	21	house	2	1	3	1
49	21	article	2	2	4	2
49	21	book	2	3	4	2
49	21	sculpture	2	0	4	2
49	21	music	2	1	5	2
49	21	flim	2	2	5	2
49	21	room	2	3	3	1
49	21	restaurant	2	0	3	2
50	48	manuscript	4	3	1	1
50	48	song	4	0	2	2
50	48	game	4	1	1	1
50	48	ball	4	2	1	1
50	48	house	4	3	1	1
50	48	article	4	0	2	1
50	48	book	4	1	1	1
50	48	sculpture	4	2	1	1
50	48	music	4	3	1	1
50	48	flim	4	0	1	1
50	48	room	4	1	1	1
50	48	restaurant	4	2	1	1
51	21	manuscript	4	3	2	4
51	21	song	4	0	2	5
51	21	game	4	1	2	6
51	21	ball	4	2
51	21	house	4	3
51	21	article	4	0
51	21	book	4	1
51	21	sculpture	4	2
51	21	music	4	3
51	21	flim	4	0
51	21	room	4	1
51	21	restaurant	4	2
52	22	manuscript	1	0	2	2
52	22	song	1	1	6	6
52	22	game	1	2
52	22	ball	1	3
52	22	house	1	0
52	22	article	1	1
52	22	book	1	2
52	22	sculpture	1	3
52	22	music	1	0
52	22	flim	1	1
52	22	room	1	2
52	22	restaurant	1	3
53	20	manuscript	1	0	4	1
53	20	song	1	1	5	4
53	20	game	1	2
53	20	ball	1	3
53	20	house	1	0
53	20	article	1	1
53	20	book	1	2
53	20	sculpture	1	3
53	20	music	1	0
53	20	flim	1	1
53	20	room	1	2
53	20	restaurant	1	3
54	20	manuscript	2	1	4	3
54	20	song	2	2	5	1
54	20	game	2	3	5	5
54	20	ball	2	0	5	5
54	20	house	2	1	3	1
54	20	article	2	2	3	2
54	20	book	2	3	5	2
54	20	sculpture	2	0	5	3
54	20	music	2	1	4	3
54	20	flim	2	2	3	1
54	20	room	2	3	4	1
54	20	restaurant	2	0	5	5
